# Supplementary material for: Enzyme Immunoassay for Measuring Aflatoxin B1 in Legal Cannabis
Source: MDPI journal article supplement (doi:10.3390/toxins12040265), 2020-04-20
Supplement: s1 [file s1]

# Supplementary Materials: Enzyme immunoassay for measuring aflatoxin B1 in legal cannabis

Fabio Di Nardo, Simone Cavaleria, Claudio Baggiani, Matteo Chiarello, Marco Pazzi and Laura Anfossi

**Table S1.** Cross-reactivity of the enzyme immunoassay towards mycotoxins.

| Mycotoxin      | CR%  |
|----------------|------|
| AFB1           | 100  |
| AFB2           | 15.8 |
| AFG1           | 25.3 |
| AFG2           | 4.3  |
| AFM1           | 2,0  |
| ochratoxin A   | <0,1 |
| deoxynivalenol | <0,1 |
| zeralenone     | <0,1 |
| fumonisins B1  | <0,1 |

**Table S2.** Recovery rates for two cannabis samples fortified with AFB1 and analyzed by the enzyme immunoassay.

| Sample id<br># | Fortification<br>Level (ng g <sup>-1</sup> ) | AFB1 ± SD<br>(ng g <sup>-1</sup> ) | Recovery<br>(%) |
|----------------|----------------------------------------------|------------------------------------|-----------------|
| JA             | 0                                            | <LOD <sup>a</sup>                  | -               |
|                | 10                                           | 8.8 ± 0.2                          | 88              |
|                | 20                                           | 20.6 ± 0.4                         | 103             |
| DI             | 0                                            | 9.7 ± 0.6                          | -               |
|                | 10                                           | 16.6 ± 0.4                         | 83              |
|                | 20                                           | 33.6 ± 1.3                         | 113             |

<sup>a</sup> The value obtained from the back calculation method (0.35 ng ml<sup>-1</sup>) was considered.

**Table S3.** SMR transitions for AFB1 quantification in cannabis products.

| Analyte | Retention Time | Precursor ion          | Product Ion                             |
|---------|----------------|------------------------|-----------------------------------------|
| AFB1    | 16.1 ± 0.1     | 313 [M+H] <sup>+</sup> | 285 [M+H – CO] <sup>+</sup>             |
| AFM1    | 12.2 ± 0.1     | 329 [M+H] <sup>+</sup> | 301 [M+H-H <sub>2</sub> O] <sup>+</sup> |

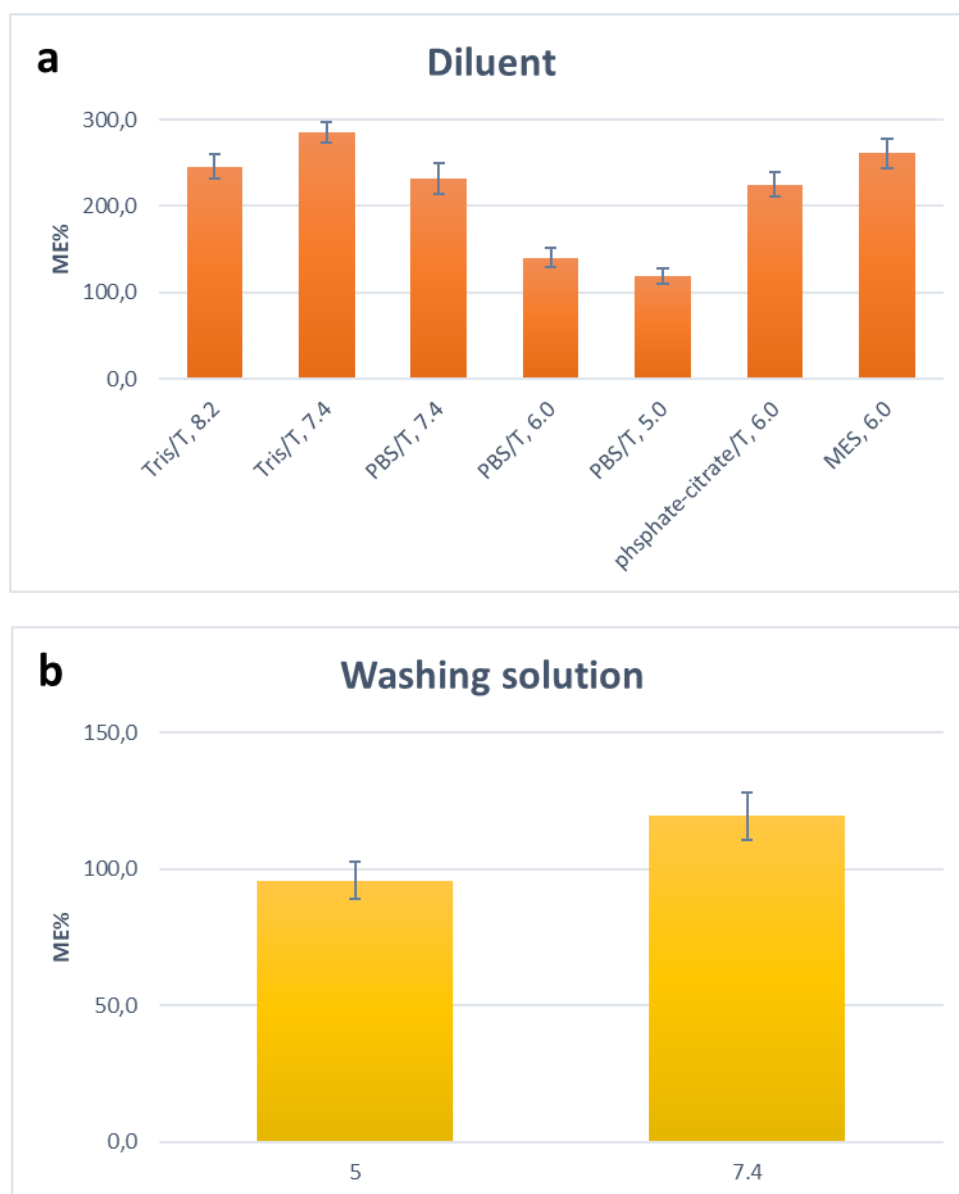

**Figure S1.** Matrix effect calculated from a fortified extract of cannabis flower when AFB1 was estimated by using different buffers as the AFB1-HRP diluent (**a**) and by removing unbound fractions by washing solutions with different pH (**b**).

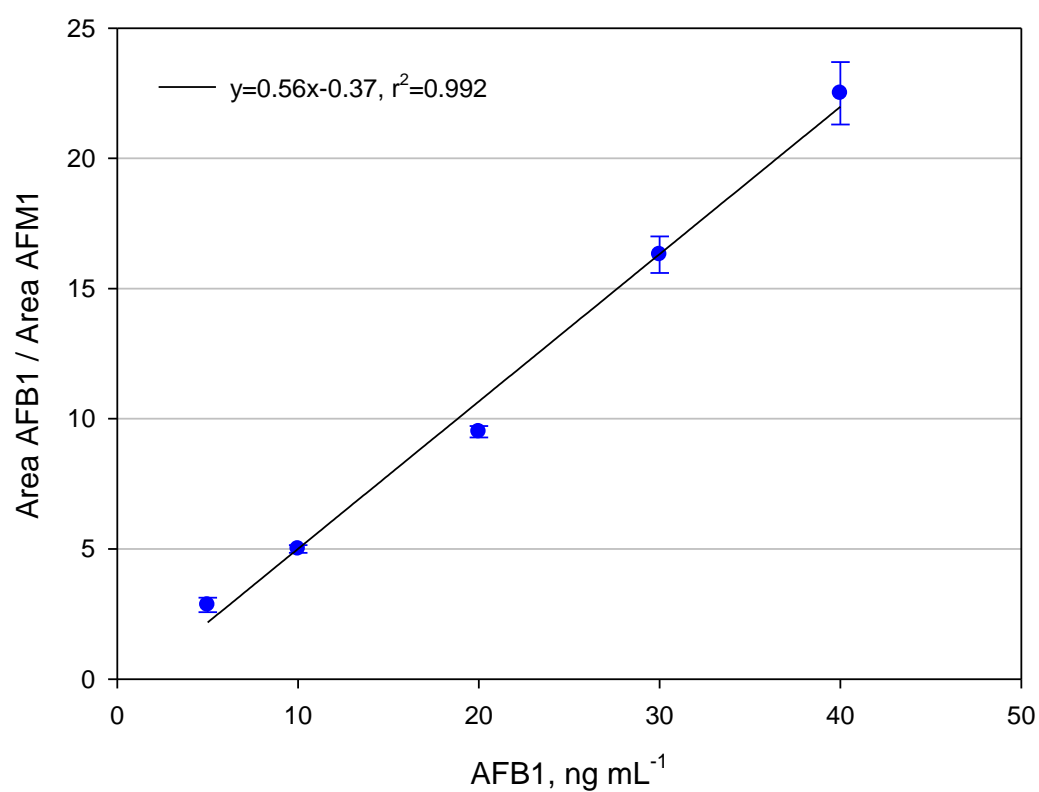

**Figure S2.** Calibration curve for the LC-MS/MS method to measure AFB1 in cannabis products. Bars represent standard deviations of three replicate measurements.
